# Supplementary material
Source: Royal Society of Chemistry journal article supplement (doi:10.1039/d6ya00089d)
Supplement: d6ya00089d1.pdf [file d6ya00089d1.pdf]

## Supplementary Information (SI)

### Cyclic ether-based electrolyte solutions for potassium metal batteries

Roy Heyns <sup>a</sup>, Robert Markowski <sup>b</sup>, Andrii Kachmar <sup>b</sup>, Johannes Ingenmey <sup>c</sup>, Wouter Monnens <sup>d</sup>, Alexandru Vlad <sup>b,e</sup>, Barbara Kirchner <sup>c</sup>, Jan Fransaer <sup>d</sup> and Koen Binnemans <sup>a\*</sup>

<sup>a</sup> KU Leuven, Department of Chemistry, Celestijnenlaan 200F, P.O. box 2404, B-3001 Leuven, Belgium.

<sup>b</sup> UC Louvain, Institute of Condensed Matter and Nanosciences, Place L. Pasteur 1, B-1348 Louvain-la-Neuve, Belgium

<sup>c</sup> University of Bonn, Mulliken Center for Theoretical Chemistry, Bonn D-53115, Germany

<sup>d</sup> KU Leuven, Department of Materials Engineering, Kasteelpark Arenberg 44, B-3001 Leuven, Belgium.

<sup>e</sup> WEL Research Institute, avenue Pasteur, 6, 1300 Wavre, Belgium

\*Corresponding author:

Email: [Koen.Binnemans@kuleuven.be](mailto:Koen.Binnemans@kuleuven.be)

**Table S1.** Ionic conductivity ( $\kappa$ ), dynamic viscosity ( $\eta$ ), density ( $\rho$ ), and  $K^+$  concentration ( $c_{K^+}$ ) of THF-KFSI electrolyte solutions, measured at 25 °C.

| Solvent-to-salt mole ratio | $\kappa$ at 25 °C (mS cm <sup>-1</sup> ) | $\eta$ at 25 °C (mPa×s) | $\rho$ at 25 °C (g cm <sup>-3</sup> ) | $c_{K^+}$ (mol L <sup>-1</sup> ) |
|----------------------------|------------------------------------------|-------------------------|---------------------------------------|----------------------------------|
| 50:1                       | 2.4                                      | 0.6                     | 0.92                                  | 0.24                             |
| 40:1                       | 2.7                                      | 0.6                     | 0.93                                  | 0.30                             |
| 30:1                       | 4.2                                      | 0.7                     | 0.94                                  | 0.39                             |
| 20:1                       | 5.8                                      | 0.8                     | 0.97                                  | 0.58                             |
| 15:1                       | 7.3                                      | 0.9                     | 0.99                                  | 0.76                             |
| 12:1                       | 8.2                                      | 1.2                     | 1.02                                  | 0.94                             |
| 10:1                       | 9.4                                      | 1.3                     | 1.04                                  | 1.11                             |
| 9:1                        | 9.7                                      | 1.5                     | 1.06                                  | 1.22                             |
| 8:1                        | 10.4                                     | 1.8                     | 1.07                                  | 1.35                             |
| 7:1                        | 11.7                                     | 2.1                     | 1.10                                  | 1.51                             |
| 6:1                        | 12.7                                     | 2.5                     | 1.12                                  | 1.72                             |
| 5:1                        | 12.6                                     | 3.5                     | 1.16                                  | 2.00                             |
| 4:1                        | 11.5                                     | 5.1                     | 1.21                                  | 2.38                             |
| 3:1                        | 11.1                                     | 9.3                     | 1.28                                  | 2.94                             |

**Table S2.** Ionic conductivity ( $\kappa$ ), dynamic viscosity ( $\eta$ ), density ( $\rho$ ), and  $K^+$  concentration ( $c_{K^+}$ ) of MeTHF-KFSI electrolyte solutions, measured at 25 °C.

| Solvent-to-salt mole ratio | $\kappa$ at 25 °C (mS cm <sup>-1</sup> ) | $\eta$ at 25 °C (mPa×s) | $\rho$ at 25 °C (g cm <sup>-3</sup> ) | $c_{K^+}$ (mol L <sup>-1</sup> ) |
|----------------------------|------------------------------------------|-------------------------|---------------------------------------|----------------------------------|
| 50:1                       | 0.3                                      | 0.5                     | 0.88                                  | 0.19                             |
| 40:1                       | 0.4                                      | 0.6                     | 0.88                                  | 0.24                             |
| 30:1                       | 0.7                                      | 0.7                     | 0.90                                  | 0.32                             |
| 20:1                       | 1.3                                      | 0.8                     | 0.92                                  | 0.47                             |
| 15:1                       | 1.9                                      | 0.8                     | 0.94                                  | 0.62                             |
| 12:1                       | 2.6                                      | 1.0                     | 0.96                                  | 0.77                             |
| 10:1                       | 3.5                                      | 1.2                     | 0.98                                  | 0.91                             |
| 9:1                        | 3.5                                      | 1.4                     | 1.00                                  | 1.00                             |
| 8:1                        | 3.9                                      | 1.5                     | 1.01                                  | 1.11                             |
| 7:1                        | 4.7                                      | 1.9                     | 1.03                                  | 1.26                             |
| 6:1                        | 5.4                                      | 2.2                     | 1.06                                  | 1.44                             |
| 5:1                        | 5.7                                      | 3.1                     | 1.09                                  | 1.68                             |
| 4:1                        | 6.4                                      | 4.8                     | 1.14                                  | 2.02                             |

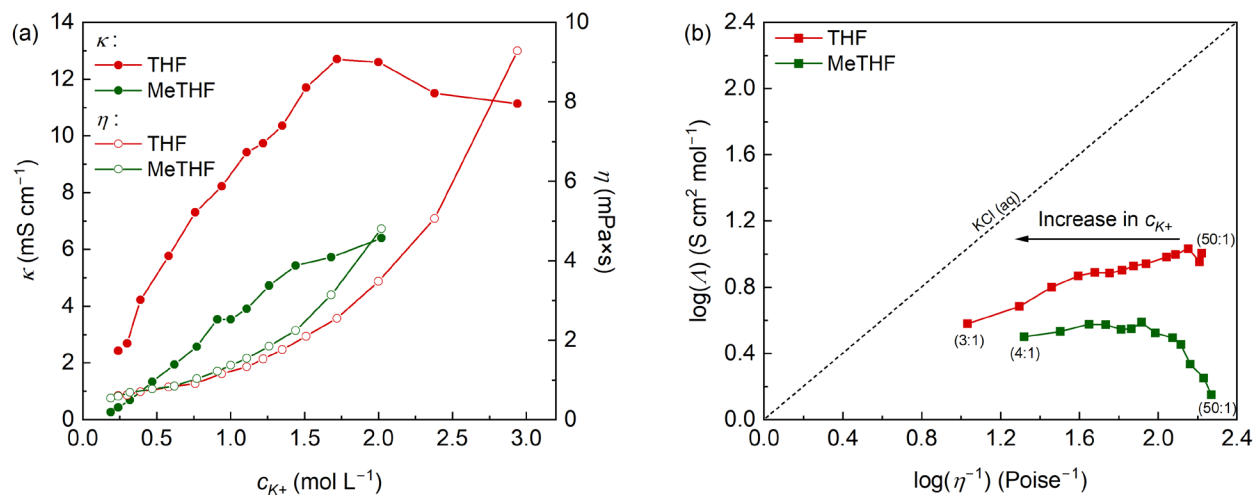

**Figure S1.** (a) Ionic conductivity and dynamic viscosity of the THF/MeTHF-KFSI binary mixtures vs. the  $K^+$  concentration in molarity, measured at 25 °C. (b) Walden plot of the THF/MeTHF-KFSI binary mixtures.

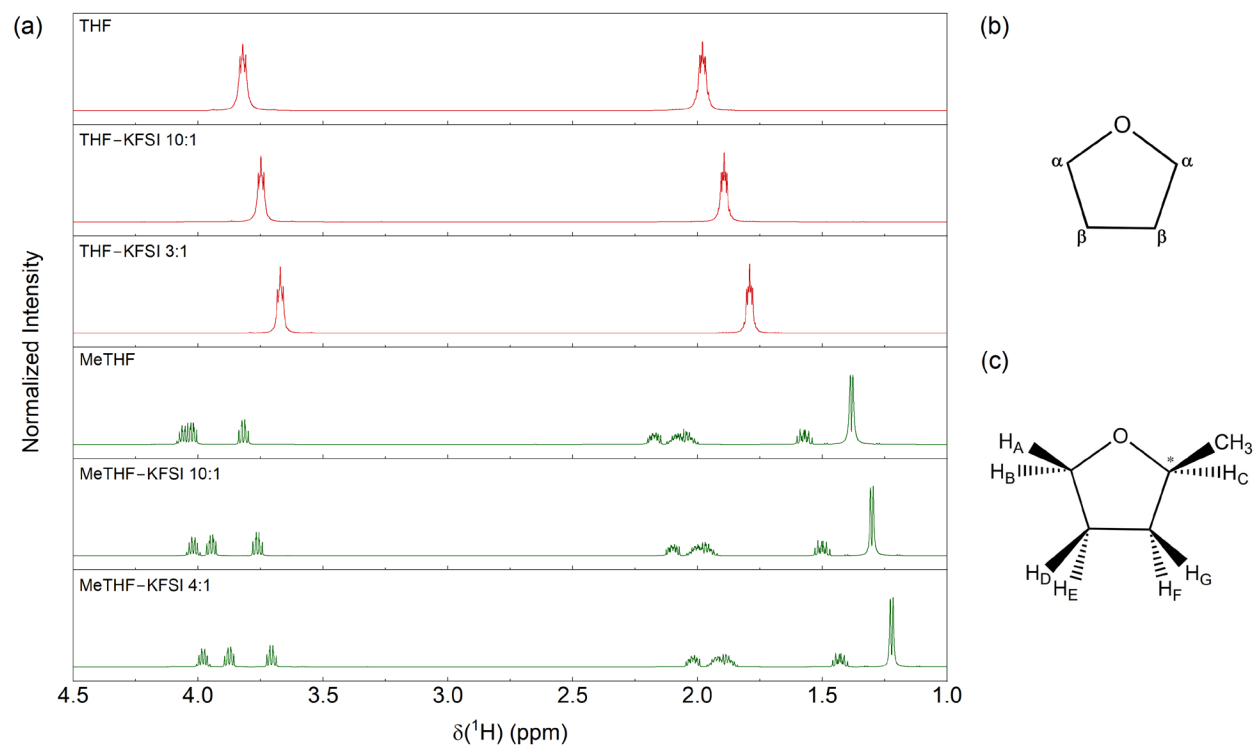

**Figure S2.** (a) Concentration dependence of the  $^1\text{H}$  NMR (600.35 MHz) chemical shifts for THF/MeTHF-KFSI binary mixtures. The spectra were individually, vertically scaled to equal intensity of the largest signal. Structural formula of (b) tetrahydrofuran and (c) (*S*)-2-methyltetrahydrofuran, with the different proton environments assigned.

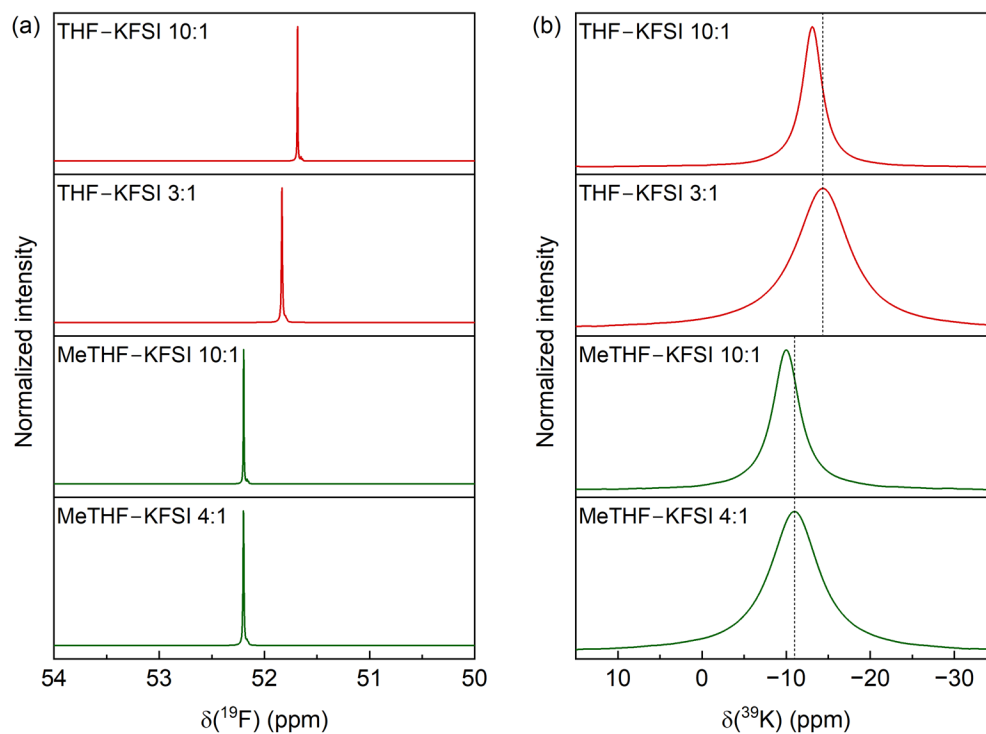

**Figure S3.** Concentration dependence of the  $^{19}\text{F}$  NMR (564.89 MHz, (a)) and  $^{39}\text{K}$  NMR (28.01 MHz, (b)) chemical shifts for THF/MeTHF-KFSI binary mixtures. All spectra were individually, vertically scaled to equal intensity of the largest signal.

**Table S3.** System composition, equilibrated box length, and density for molecular dynamics simulations of the two electrolyte solutions at 298.15 K.

| Electrolyte solution | THF /<br>MeTHF | KFSI | Box length $a$ (Å) | $\rho_{\text{calc.}}$ at 298.15 K<br>( $\text{g cm}^{-3}$ ) |
|----------------------|----------------|------|--------------------|-------------------------------------------------------------|
| THF-KFSI 3:1         | 750            | 250  | 53.13              | 1.21                                                        |
| MeTHF-KFSI 4:1       | 800            | 200  | 55.42              | 1.10                                                        |

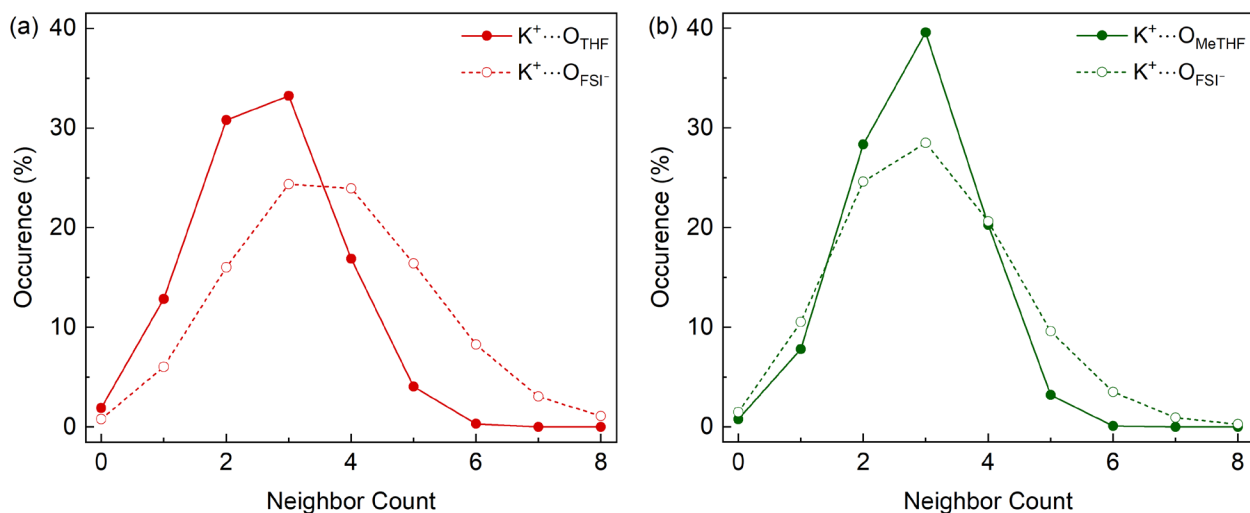

**Figure S4.** Neighbor count histogram for the cation's first solvation shell in (a) THF-KFSI 3:1 and (b) MeTHF-KFSI 4:1.

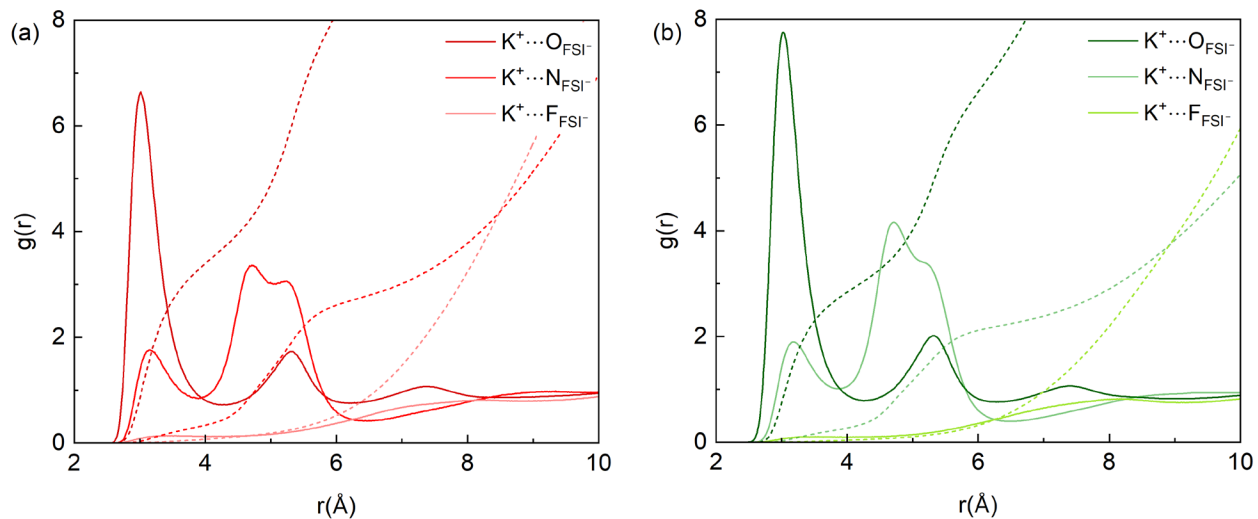

**Figure S5.** Radial distribution functions (solid lines) and number integrals (dashed lines) of the  $K^+$  cation interacting with different atoms of the  $FSI^-$  anion in (a) THF-KFSI 3:1 and (b) MeTHF-KFSI 4:1.

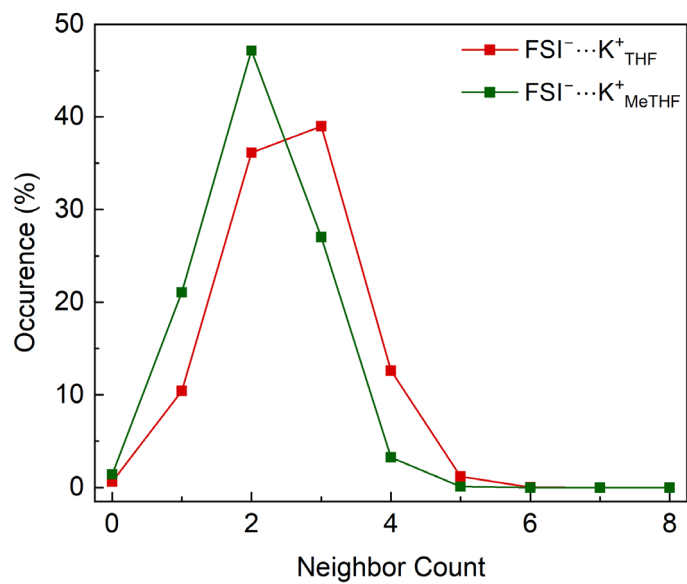

**Figure S6.** Neighbor count histogram for the anion's first solvation shell in THF-KFSI 3:1 and MeTHF-KFSI 4:1.

**Table S4.** Overview of the galvanostatic cycling experiments conducted in K || Al half-cells cycled in THF-KFSI 3:1 and in MeTHF-KFSI 4:1, with two coin cells tested for each cycling condition.

| Cell configuration | Electrolyte solution | Coin cell | Cycling conditions                                | CE <sub>Initial</sub> (%) | Cycle number | $\eta$ First cycle (V) |
|--------------------|----------------------|-----------|---------------------------------------------------|---------------------------|--------------|------------------------|
| K    Al            | THF-KFSI 3:1         | 1         | 0.5 mA cm <sup>-2</sup><br>1 mAh cm <sup>-2</sup> | 95.4                      | > 500        | 0.142                  |
|                    |                      | 2         |                                                   | 93.6                      | > 500        | 0.139                  |
|                    | MeTHF-KFSI 4:1       | 1         |                                                   | 88.7                      | > 500        | 0.188                  |
|                    |                      | 2         |                                                   | 91.6                      | > 500        | 0.194                  |
|                    | THF-KFSI 3:1         | 1         | 1.0 mA cm <sup>-2</sup><br>1 mAh cm <sup>-2</sup> | 94.9                      | > 350        | 0.196                  |
|                    |                      | 2         |                                                   | 93.0                      | > 350        | 0.192                  |
|                    | MeTHF-KFSI 4:1       | 1         |                                                   | 75.7                      | > 350        | 0.274                  |
|                    |                      | 2         |                                                   | 89.0                      | > 350        | 0.249                  |
|                    | THF-KFSI 3:1         | 1         | 2.0 mA cm <sup>-2</sup><br>1 mAh cm <sup>-2</sup> | 93.2                      | > 200        | 0.249                  |
|                    |                      | 2         |                                                   | 97.5                      | > 200        | 0.252                  |
|                    | MeTHF-KFSI 4:1       | 1         |                                                   | 74.8                      | > 150        | 0.346                  |
|                    |                      | 2         |                                                   | 82.9                      | 36           | 0.333                  |
|                    | THF-KFSI 3:1         | 1         | 4.0 mA cm <sup>-2</sup><br>1 mAh cm <sup>-2</sup> | 90.8                      | 104          | 0.327                  |
|                    |                      | 2         |                                                   | 98.5                      | 96           | 0.328                  |
|                    | MeTHF-KFSI 4:1       | 1         |                                                   | 72.5                      | 35           | 0.422                  |
|                    |                      | 2         |                                                   | 74.5                      | 29           | 0.414                  |

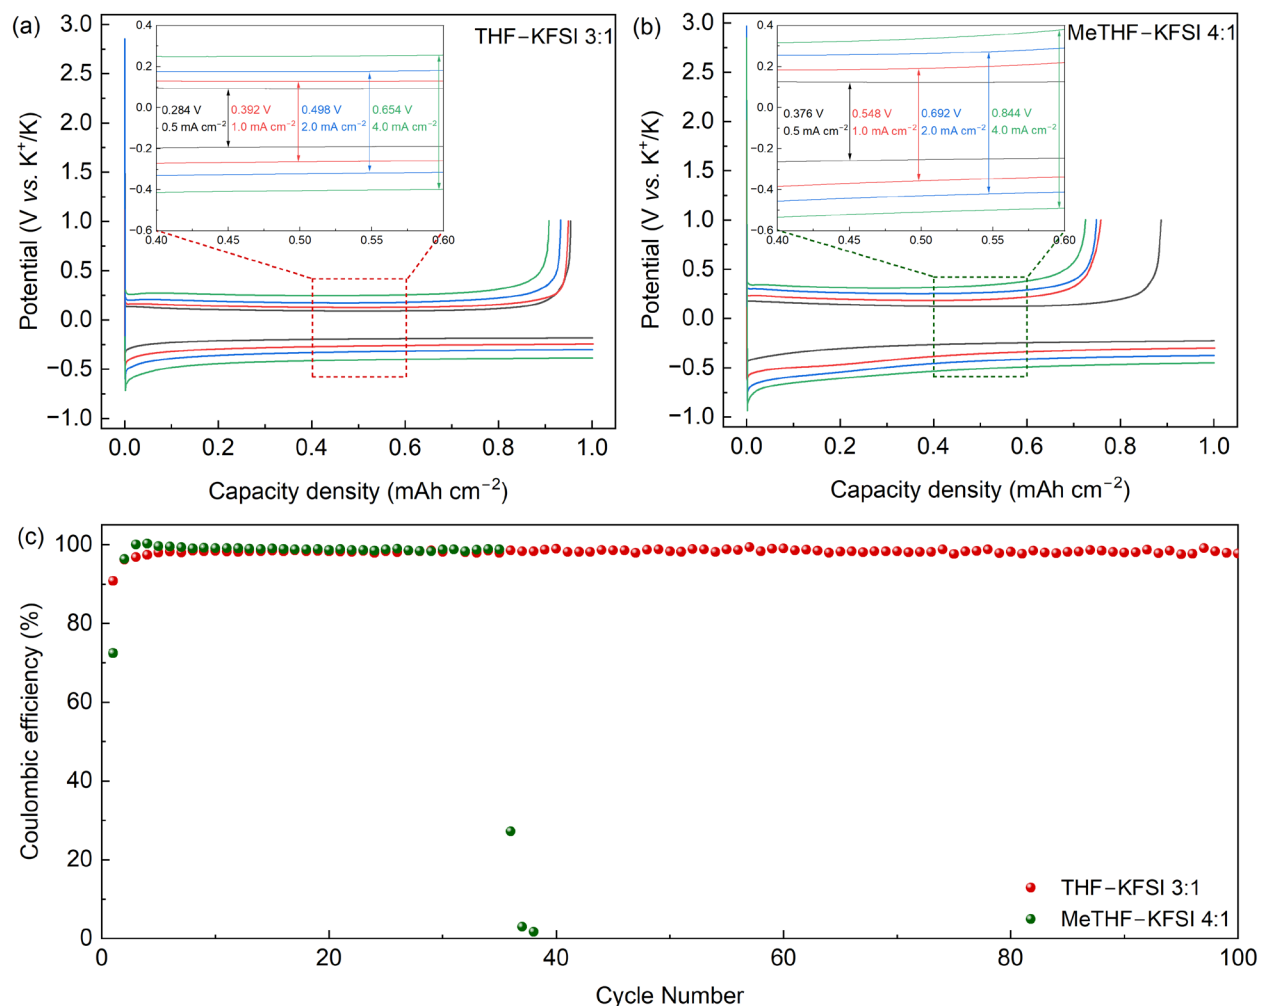

**Figure S7.** Potassium metal plating/stripping behavior in THF/MeTHF-KFSI electrolyte solutions. Polarization profiles of the K||Al half-cell configuration cycled in (a) THF-KFSI 3:1 and in (b) MeTHF-KFSI 4:1 at different current densities with a cutoff capacity of 1 mAh cm<sup>-2</sup>. (c) Potassium metal plating/stripping CE of the K||Al half-cell cycled in different electrolyte solutions at a current density of 4.0 mA cm<sup>-2</sup> with a cutoff capacity of 1 mAh cm<sup>-2</sup>.

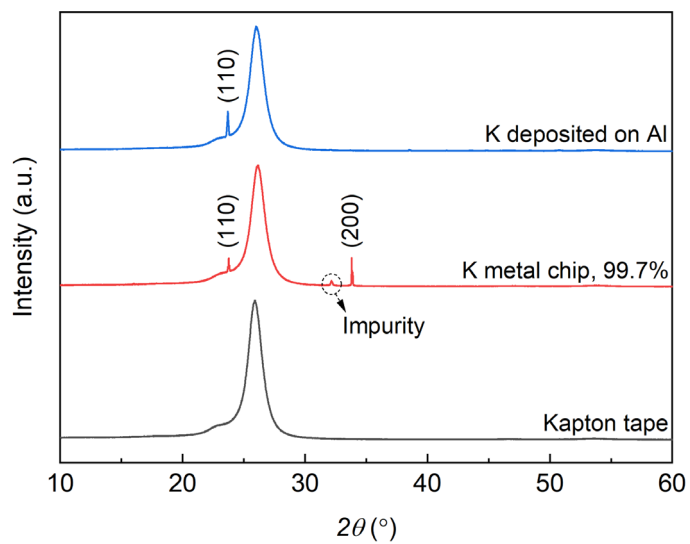

**Figure S8.** X-ray diffraction (XRD) pattern of Kapton tape, potassium metal chip with a purity of 99.7% and potassium metal electrochemically deposited on aluminum foil ( $0.5 \text{ mA cm}^{-2}$ ;  $1 \text{ mAh cm}^{-2}$  – during discharge).

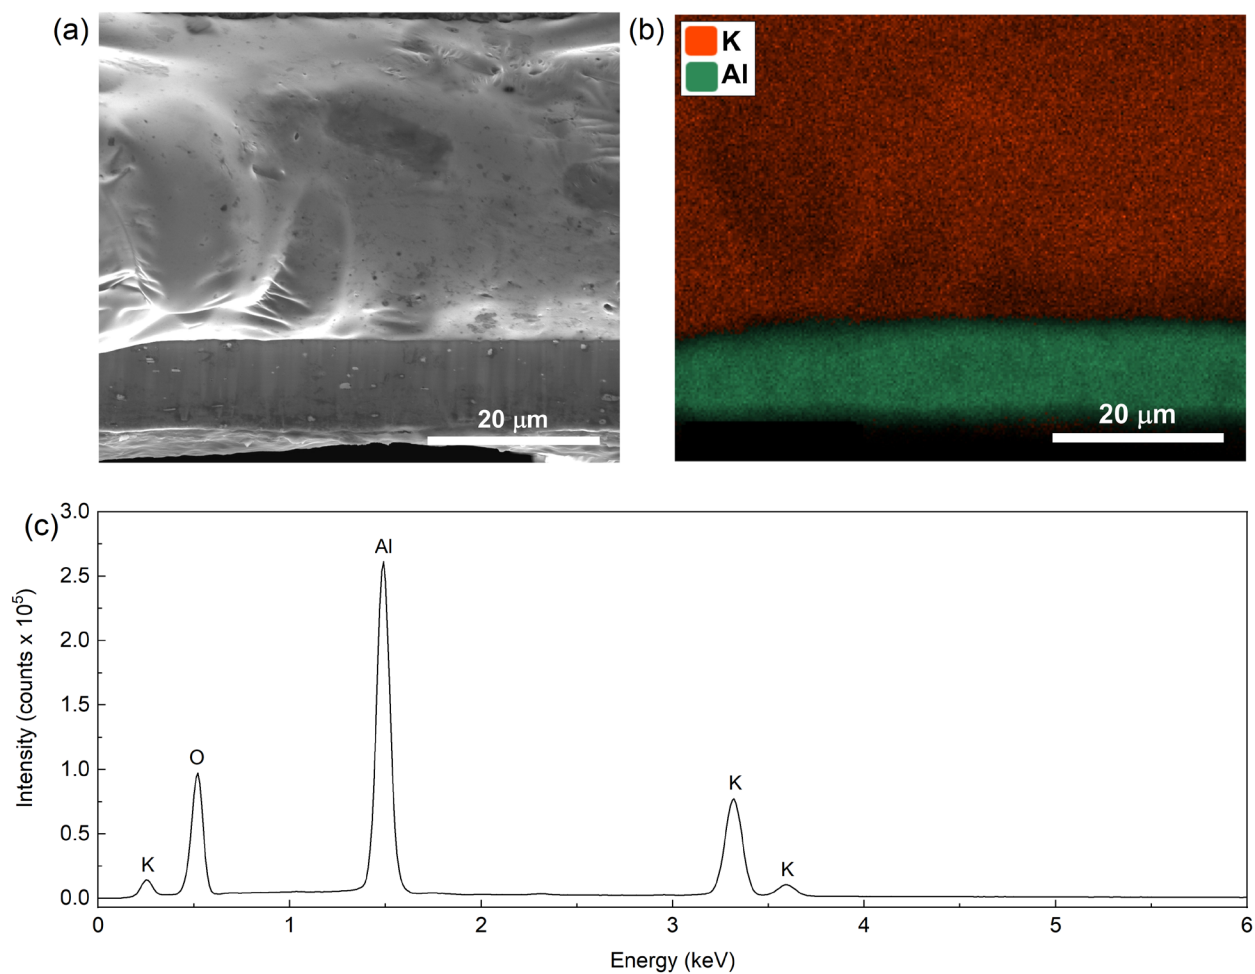

**Figure S9.** (a) SEM cross section image of the deposited potassium metal on the aluminum current collector after discharging of the first cycle at  $0.5 \text{ mA cm}^{-2}$  under  $1 \text{ mAh cm}^{-2}$  in THF-KFSI 3:1. (b) EDX elemental mapping and (c) EDX spectrum of the cross section.

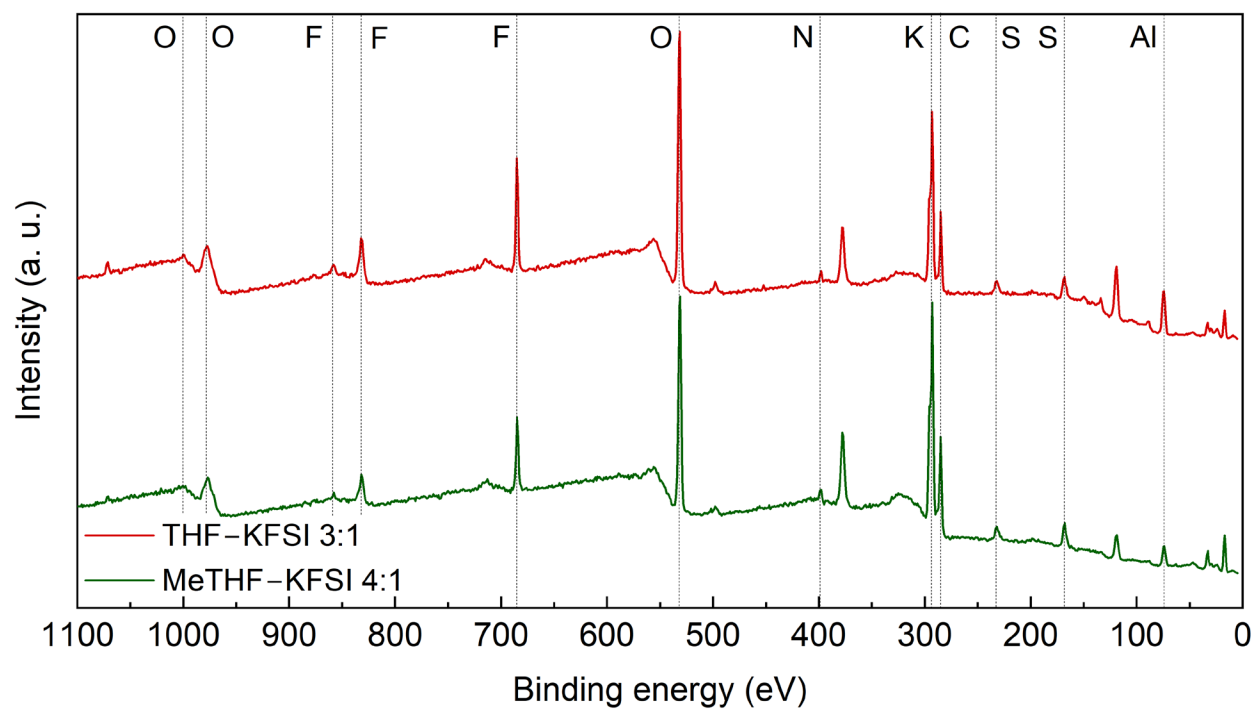

**Figure S10.** XPS profiles of the SEIs formed on the aluminum electrode after the first cycle in THF-KFSI 3:1 and MeTHF-KFSI 4:1.

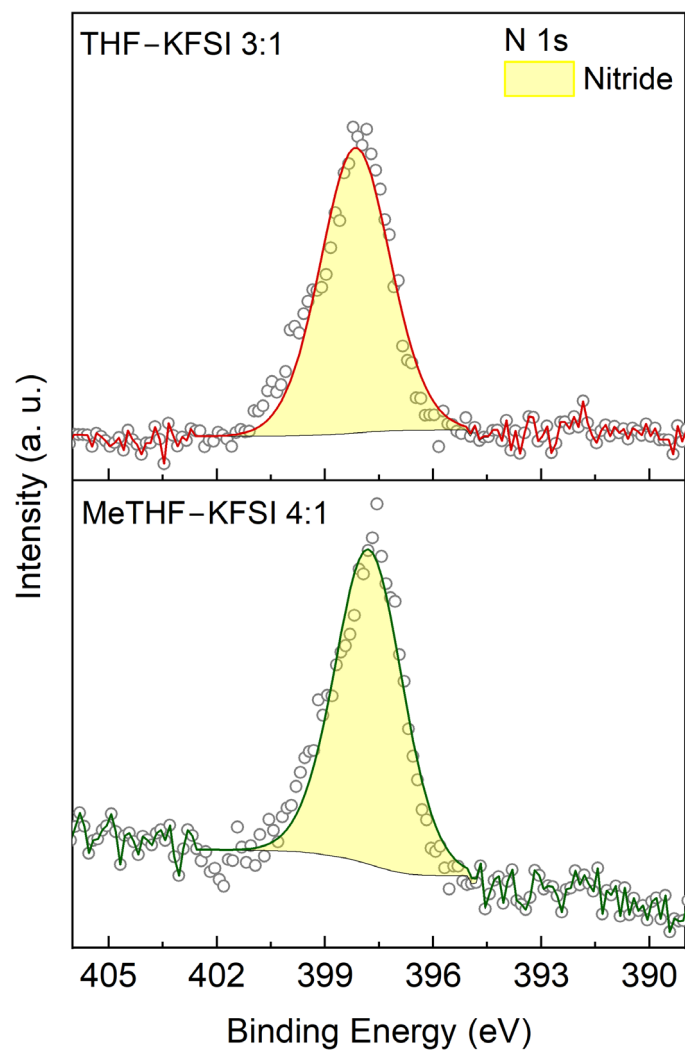

**Figure S11.** N 1s XPS spectra of the SEI layers formed on the aluminum current collector after the first cycle in THF-KFSI 3:1 and MeTHF-KFSI 4:1.

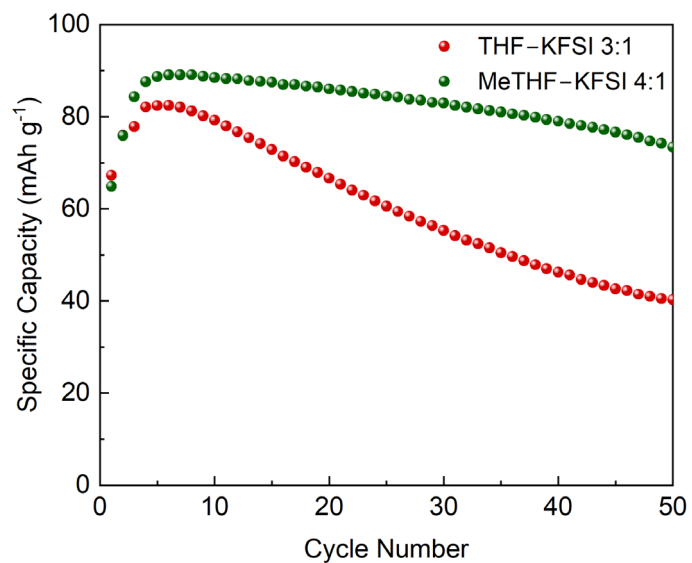

**Figure S12.** Cycling performance of AC | K<sub>2</sub>-Co-PTtSA cells in THF-KFSI 3:1 and MeTHF-KFSI 4:1 at a rate of 0.1C.
